# Supplementary material for: Comparison of Metabolic Rates of Young of the Year Beluga (Huso huso), Sterlet (Acipenser ruthenus) and Bester Hybrid Reared in a Recirculating Aquaculture System
Source: MDPI journal article supplement (doi:10.3390/fishes6040046), 2021-10-09
Supplement: s1 [file s1]

Archive with 1 entries (1 files):
- fishes-1372084-supplementary.pdf
